# Supplementary material for: Why Healthcare Workers Delay Care: A Comparison of Clinical and Non-clinical Staff in Ondo State, Nigeria
Source: Research Square preprint supplement (doi:10.21203/rs.3.rs-8017279/v1), 2025-12-17
Supplement: Supplementary file 1 [file 585faad31af7447da7387bf9.docx]

**Questionnaire**

**Dear Participant,**
We are conducting a study **titled**
*Why Healthcare Workers Delay Care: A Comparison of Clinical and Non-Clinical Staff in Ondo State.* Your honest responses will help identify ways to support better health practices among all staff. The information you provide will be confidential and used for research purposes only.
Thank you

**Section A: Socio-demographic**

1. Age (in years): _______
2. Gender: ☐ Male ☐ Female
3. Marital Status: ☐ Single ☐ Married ☐ Divorced/Separated ☐ Widowed
4. Religion: ☐ Christianity ☐ Islam ☐ Traditional ☐ Others (please specify) ______
5. Ethnic Group: ☐ Yoruba ☐ Igbo ☐ Others (please specify) ______
6. Highest Level of Education: ☐ Primary ☐ Secondary ☐ Tertiary
7. Occupation: __________________________
8. Department/Unit: __________________________
9. Years of Work Experience: _______ years
10. Monthly Income Range: ☐ ₦30,000 or less ☐ ₦31,000–₦100,000 ☐Above ₦100,000
11. Type of Staff: ☐ Clinical ☐ Non-Clinical

**Section B: Personal Health and Lifestyle**

1. How would you describe your current state of health?
   ☐ Excellent ☐ Very Good ☐ Good ☐ Poor
2. Do you have any health condition that needs regular monitoring (e.g., hypertension, diabetes)?
   ☐ Yes ☐ No
3. Are you currently on regular medication?
   ☐ Yes ☐ No
4. When was the last time you were ill?
   ☐ Within the past 3 months ☐ 3–6 months ago ☐ Over 6 months ago ☐ Can’t recall
5. How serious was your last illness?
   ☐ Mild ☐ Moderate ☐ Severe
6. How often do you exercise or engage in physical activity?
   ☐ Daily ☐ Weekly ☐ Occasionally ☐ Rarely ☐ Never
7. How would you rate your eating habits?
   ☐ Healthy ☐ Fair ☐ Unhealthy

**Section C: Health-Seeking Behaviour**

1. When you notice a health problem, what do you usually do first?
    ☐ Visit a hospital or clinic
   ☐ Buy drugs from a pharmacy
   ☐ Rest and monitor the symptoms
   ☐ Use home or traditional remedies
2. If you don’t seek medical care immediately, why? (You may tick more than one)
   ☐ Lack of time
   ☐ Cost of care
   ☐ Fear of diagnosis
   ☐ Prefer self-medication
   ☐ Other (please specify): __________
3. When last were you treated by a qualified doctor or nurse for any illness?
   ☐ Within 6 months ☐ 6–12 months ago ☐ Over a year ago
4. Which type of health facility do you prefer to visit when ill?
   ☐ Public ☐ Private ☐ Faith-based ☐ Traditional ☐ Patent medicine vendor
5. What motivates you most to seek healthcare?
   ☐ Severity of illness
   ☐ Fear of complications
   ☐ Family or colleague’s advice
   ☐ Availability of insurance
   ☐ Others: ___________
6. Have you ever delayed treatment even when you were ill?
   ☐ Yes ☐ No
   If yes, why? _______________________________

**Section D: Utilization of Health Services**

1. Do you have health insurance coverage (NHIS or any other)?
   ☐ Yes ☐ No
2. Have you accessed healthcare services in the past 12 months?
   ☐ Yes ☐ No
3. How do you usually access healthcare services?
   ☐ Regular clinic appointment
   ☐ Phone consultation
   ☐ Self-treatment
4. When you receive a prescription from a doctor, how often do you follow it fully?
   ☐ Always ☐ Sometimes ☐ Rarely ☐ Never
5. How often do you go for medical check-ups?
   ☐ Monthly ☐ Quarterly ☐ Yearly ☐ Can’t recall
6. What challenges make it difficult for you to use health services regularly?
   ☐ Long waiting time
   ☐ High cost
   ☐ Lack of privacy/confidentiality
   ☐ Shortage of staff
   ☐ Distance or transportation
   ☐ Other: ____________________

**KII GUIDE FOR HEALTHCARE WORKERS**

1. What do you understand about ‘Health-seeking Behaviour’?

- Probe for patterns or options adopted by healthcare workers and people in the community

1. How do you perceive your own health and well-being as a healthcare worker?

- Probe for the reasons for their perception

1. What factors motivate or influence you to seek healthcare services for yourself?

- Probe for instances where their professional training and knowledge has led them to approach their health concerns in a certain way, with examples
- Probe for cultural or societal attitudes that influence how people perceive healthcare seeking

1. What factor(s) would you say is (are) affecting the utilisation of healthcare services by healthcare workers?

- Probe for proximity, lack of fund, poor quality of care, poor attitude of healthcare workers, availability of health insurance etc
